# Supplementary material for: Circulating N-lactoyl-amino acids and N-formyl-methionine reflect mitochondrial dysfunction and predict mortality in septic shock
Source: PubMed Central journal article supplement (PMC10917846; doi:10.1007/s11306-024-02089-z), 2024-03-06
Supplement: 11306_2024_2089_MOESM3_ESM.pdf [file 11306_2024_2089_MOESM3_ESM.pdf]

## Supplemental Table 1. Extended Clinical Information

### Cardiogenic Shock Subjects (n=19)

|                                               |         |
|-----------------------------------------------|---------|
| Left Ventricular Ejection Fraction, mean (SD) | 24 (15) |
| % receiving inotropic support                 | 95      |
| % receiving mechanical circulatory support    | 28      |

### Septic Shock Subjects (n=42)

|                                                       |             |
|-------------------------------------------------------|-------------|
| Norepinephrine-equivalent vasopressor dose, mean (SD) | 25.6 (26.1) |
|-------------------------------------------------------|-------------|

### Source of Infection, %\*:

|                                   |    |
|-----------------------------------|----|
| Pneumonia                         | 57 |
| Urinary Tract                     | 24 |
| Intra-abdominal                   | 21 |
| Skin & Soft Tissue                | 17 |
| Direct Bloodstream & Endocarditis | 7  |

### Organisms, n:

|                                                    |    |
|----------------------------------------------------|----|
| <i>Clostridium difficile</i>                       | 3  |
| Coagulase-negative <i>Staphylococcus</i> species   | 3  |
| <i>Cornebacterium</i> species                      | 2  |
| <i>Escherichia coli</i>                            | 4  |
| <i>Enterococcus</i> species                        | 4  |
| <i>Haemophilus influenzae</i>                      | 1  |
| Influenza A                                        | 3  |
| <i>Klebsiella</i> species                          | 6  |
| Methicillin-resistant <i>Staphylococcus aureus</i> | 4  |
| Methicillin-sensitive <i>Staphylococcus aureus</i> | 2  |
| <i>Pseudomonas aeruginosa</i>                      | 1  |
| <i>Serratia marcescens</i>                         | 1  |
| <i>Streptococcus agalactiae</i>                    | 1  |
| <i>Streptococcus pneumoniae</i>                    | 2  |
| Unspecified gram negative rods                     | 2  |
| No positive microbiological data                   | 13 |

\*total exceeds 100% as subjects could have multiple sources of infection
